# Supplementary material for: Size-dependent acidity of aqueous nano-aerosols
Source: Royal Society of Chemistry journal article supplement (doi:10.1039/d4cp01752h), 2024-01-01
Supplement: d4cp01752h1.pdf [file d4cp01752h1.pdf]

## Supporting Information

### Size-dependent Acidity of Aqueous Nano-aerosols

Wanrong Song,<sup>#</sup> Shaoxun Guo,<sup>#</sup> Hui Li<sup>\*</sup>

Beijing Advanced Innovation Center for Soft Matter Science and Engineering, Beijing  
University of Chemical Technology, Beijing 100029, China

<sup>#</sup>These authors contributed equally: Wanrong Song, Shaoxun Guo

<sup>\*</sup>E-mail: [hli@mail.buct.edu.cn](mailto:hli@mail.buct.edu.cn)

### Table of Contents

|                                             |    |
|---------------------------------------------|----|
| <b>Section I: Simulation Methods</b> .....  | 2  |
| <b>Section II: Supporting Figures</b> ..... | 6  |
| <b>Section III: Supporting Tables</b> ..... | 15 |
| <b>Section IV: References</b> .....         | 23 |

## Section I: Simulation Methods

**Calculation of pK<sub>a</sub>.** The dissociation of an acid HA in aqueous solution is expressed as follows,

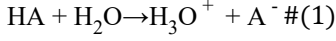

For the dissociation equilibrium of HA, the relationship is as follows,

$$\mu_{\text{aq}}(\text{A}^-) + \mu_{\text{aq}}(\text{H}_3\text{O}^+) - \mu_{\text{aq}}(\text{HA}) - \mu_{\text{aq}}(\text{H}_2\text{O}) = 0 \#(2)$$

where  $\mu_{\text{aq}}(\text{X})$  represents the chemical potential of X in the aqueous phase, which can be calculated as follows by Pliego<sup>1</sup>,

$$\mu_{\text{aq}}^{\text{M}}(\text{X}) = \mu_{\text{gas}}^{\text{M}}(\text{X}) + \Delta G_{\text{s}}(\text{X}) + RT \ln[\text{X}] \#(3)$$

where “M” represents the standard state of 1 M, and  $\mu_{\text{gas}}^{\text{M}}(\text{X})$  represents the chemical potential of X in the gas phase, considered to be the ideal gas at 1 M. The second term  $\Delta G_{\text{s}}(\text{X})$  is the solvation free energy leading the solute from a fixed position in gas phase to the fixed position in the solution defined by Ben-Naim<sup>2</sup>. And the last term is in connection with the concentration of X in solution.

The deprotonation free energy of the HA molecule in the aqueous phase could be obtained through Eq. (2-3),

$$\Delta G_{\text{aq}} = -RT \ln \frac{[\text{H}_3\text{O}^+][\text{A}^-]}{[\text{HA}][\text{H}_2\text{O}]} \#(4)$$

$$\Delta G_{\text{aq}} = \Delta G_{\text{gas}}^{\text{M}} + \Delta \Delta G_{\text{s}} \#(5)$$

$$\Delta \Delta G_{\text{s}} = \Delta G_{\text{s}}(\text{H}_3\text{O}^+) + \Delta G_{\text{s}}(\text{A}^-) - \Delta G_{\text{s}}(\text{HA}) - \Delta G_{\text{s}}(\text{H}_2\text{O}) \#(6)$$

$$\Delta G_{\text{gas}} = \mu_{\text{gas}}^{\text{M}}(\text{H}_3\text{O}^+) + \mu_{\text{gas}}^{\text{M}}(\text{A}^-) - \mu_{\text{gas}}^{\text{M}}(\text{HA}) - \mu_{\text{gas}}^{\text{M}}(\text{H}_2\text{O}) \#(7)$$

where  $\Delta \Delta G_{\text{s}}$  is the difference of the solvation free energy between the dissociated state

and the undissociated state,  $\Delta G_s$  is the solvation free energy of aerosol particle,  $\Delta G_{\text{gas}}$  is the deprotonation free energy of HA in the gas phase, respectively.

For the dissociation of HA, the equilibrium constant  $K_{\text{eq}}$  is related to the dissociation constant  $K_a$  according to following equation,

$$K_{\text{eq,HA}} = \frac{[\text{H}_3\text{O}^+][\text{A}^-]}{[\text{HA}][\text{H}_2\text{O}]} = \frac{K_{\text{a,HA}}}{[\text{H}_2\text{O}]} \#(8)$$

Thus, the dissociation constant  $\text{p}K_a$  can be calculated by

$$\text{p}K_{\text{a,HA}} = \frac{\Delta G_{\text{aq}}}{2.303RT} - \lg[\text{H}_2\text{O}] \#(9)$$

**Aerosol acidity calculation.** Without consideration of multiphase distribution, the concentration of hydronium ions in the solution can be calculated by

$$[\text{H}_3\text{O}^+]_{\text{total}} = [\text{H}_3\text{O}^+]_{\text{HA}} + [\text{H}_3\text{O}^+]_{\text{H}_2\text{O}} = \frac{[\text{HA}]K_{\text{a,HA}}}{[\text{A}^-]} + \frac{[\text{H}_2\text{O}]K_{\text{a,H}_2\text{O}}}{[\text{OH}^-]} \#(10)$$

When the acidity is derived from the simulated system, the concentration is variable, and the aerosol acidity is the result of the combination of concentration and solvent size.

The solute concentration is calculated by

$$c_{\text{HA}} = 55.5/N \#(11)$$

where  $N$  denotes the molecular number of nanodroplet. The corresponding pH value of the system is

$$\text{pH} = -\lg(\sqrt{55.5 \cdot K_{\text{a,HA}}/N} + \sqrt{55.5 \cdot K_{\text{a,H}_2\text{O}}}) \#(12)$$

In the second situation, we considered a statistic system with varying aerosol size and fixed solute concentration (e.g., 0.001M). The pH value is calculated by

$$\text{pH} = -\lg(\sqrt{0.001 \cdot K_{\text{a,HA}}} + \sqrt{55.5 \cdot K_{\text{a,H}_2\text{O}}}) \#(13)$$

In order to understand the size-dependent acidity of nucleation mode aerosols containing buffer pairs, the buffer pairs in nanodroplets under the constant concentration of 0.001 M were also discussed. The corresponding pH value is

$$\text{pH} = -\lg(\sqrt{K_{a,\text{HA}}} + \sqrt{55.5 \cdot K_{a,\text{H}_2\text{O}}}) \quad (14)$$

Considering the distribution of acids between the gas and liquid phases, the  $\text{pH}^*$  value in above situation is calculated by

$$\text{pH}^* = -\lg(\sqrt{55.5 \cdot K_{a,\text{HA}}^* / N} + \sqrt{55.5 \cdot K_{a,\text{H}_2\text{O}}^*}) \quad (15)$$

$$\text{pH}^* = -\lg(\sqrt{0.001 \cdot K_{a,\text{HA}}^*} + \sqrt{55.5 \cdot K_{a,\text{H}_2\text{O}}^*}) \quad (16)$$

$$\text{pH}^* = -\lg(\sqrt{K_{a,\text{HA}}^*} + \sqrt{55.5 \cdot K_{a,\text{H}_2\text{O}}^*}) \quad (17)$$

**Relationship between the number of water molecules ( $N^{-\frac{1}{3}}$ ) and the size of nano-particles.** In our studies,  $N^{-\frac{1}{3}}$  is corresponding to the particle size of nanoparticle in the simulation. All the simulated geometric structures and its size are shown in Section II (Supporting Figures). Based on our modelling methods, the relationship between  $N^{-\frac{1}{3}}$  and the radius of nano-particle ( $R$ ) is as follows:

$$N^{-\frac{1}{3}} = \left( \frac{N_A \rho \left( \frac{4}{3} \pi R^3 \right)}{M_{\text{water}}} \right)^{-\frac{1}{3}} = \left( \frac{4 \pi N_A \rho}{3 M_{\text{water}}} \right)^{-\frac{1}{3}} \frac{1}{R} \quad (18)$$

where  $N_A$  is the Avogadro's constant ( $6.02 \times 10^{23} \text{ mol}^{-1}$ ),  $\rho$  is the density of water,  $R$  is the radius of nano-particle ( $R = 1, 1.5, 2, 2.5, 3, 3.5, 4 \text{ nm}$ ), and  $M_{\text{water}}$  is the mole-mass of water.

**Details of MD Simulations.** The bulk phase system was simulated in a cubic box of  $3.0 \times 3.0 \times 3.0 \text{ nm}^3$ , including one solute and 900 SWM4-NDP<sup>3</sup> water molecules. The MD simulations were performed in the constant pressure and constant temperature (NPT) ensemble using the periodic boundary conditions,<sup>4</sup> using the Langevin dynamics to control fluctuations in the barostat. For the droplet system, the nanoaerosol was simulated in a large cubic box, in which the self-interaction between the solute and its replica could

be neglected.<sup>5</sup> The nanoaerosol systems (containing one solute and 60, 140, 270, 470, 750, and 1120 SWM4-NDP water molecules, respectively) were simulated in the constant volume and constant temperature (NVT) ensemble. In all the MD simulation, the Langevin dynamics with a dual Langevin thermostat was used to keep the temperature of systems at 298.15 K and the Drude oscillators at 1.0 K, with a timestep of 0.5 fs. The coupling parameter for simulation of ions varied linearly from 0 to 1 in increments of 0.1, while the increment was set as 0.05 for the neutral molecules to obtain accurate values. For each window, the forward and backward productions were carried out and the Bennett's acceptance ratio<sup>6</sup> method was used to calculate the solvation free energy. During the production stage, each window was equilibrated for 50.0 ps, and then the production trajectory was collected for the next 250.0 ps.<sup>7</sup> Figure S1-S9 list the initial structures of HNO<sub>3</sub>, NO<sub>3</sub><sup>-</sup>, NH<sub>4</sub><sup>+</sup>, NH<sub>3</sub>, H<sub>3</sub>O<sup>+</sup>, OH<sup>-</sup>, H<sub>2</sub>O, HSO<sub>4</sub><sup>-</sup> and SO<sub>4</sub><sup>2-</sup> in bulk solution and nanodroplets with different diameters, which were constructed using the Packmol package, respectively.<sup>8</sup>

**Solvation Free Energy.** The solvation free energy was calculated using the FEP method.<sup>9</sup> The Gibbs free energy change from state A to state B was obtained by

$$\Delta G(A \rightarrow B) = G_B - G_A = -k_B T \ln \left\langle \exp \left[ \frac{-(U_B - U_A)}{k_B T} \right] \right\rangle_A \quad (19)$$

where  $U_A$  and  $U_B$  were the potential energies of states A and B, respectively. The transition between the initial state and the final state was implemented by introducing coupling parameters.<sup>10</sup>

**Deprotonation Free Energy in Gas Phase.** The deprotonation energies of HA in the gas phase were calculated using the density functional theory (DFT) method implemented in Gaussian 09 package.<sup>11</sup> All the geometries were optimized at the

B3LYP/6-311++G\*\* level.<sup>12</sup> The single point energy was computed at the CCSD(T)/aug-cc-pVTZ<sup>13</sup> level, while except the M05-2X/6-31G\* level for HSO<sub>4</sub><sup>-</sup> and SO<sub>4</sub><sup>2-</sup>, since the energy value at M05-2X/6-31G\* level for HSO<sub>4</sub><sup>-</sup> and SO<sub>4</sub><sup>2-</sup> is the closest to the experimental values.<sup>14</sup> Table S1 compares the single point energy of HSO<sub>4</sub><sup>-</sup> and SO<sub>4</sub><sup>2-</sup> and dissociation constants of HSO<sub>4</sub><sup>-</sup> calculated at different levels.

## Section II: Supporting Figures

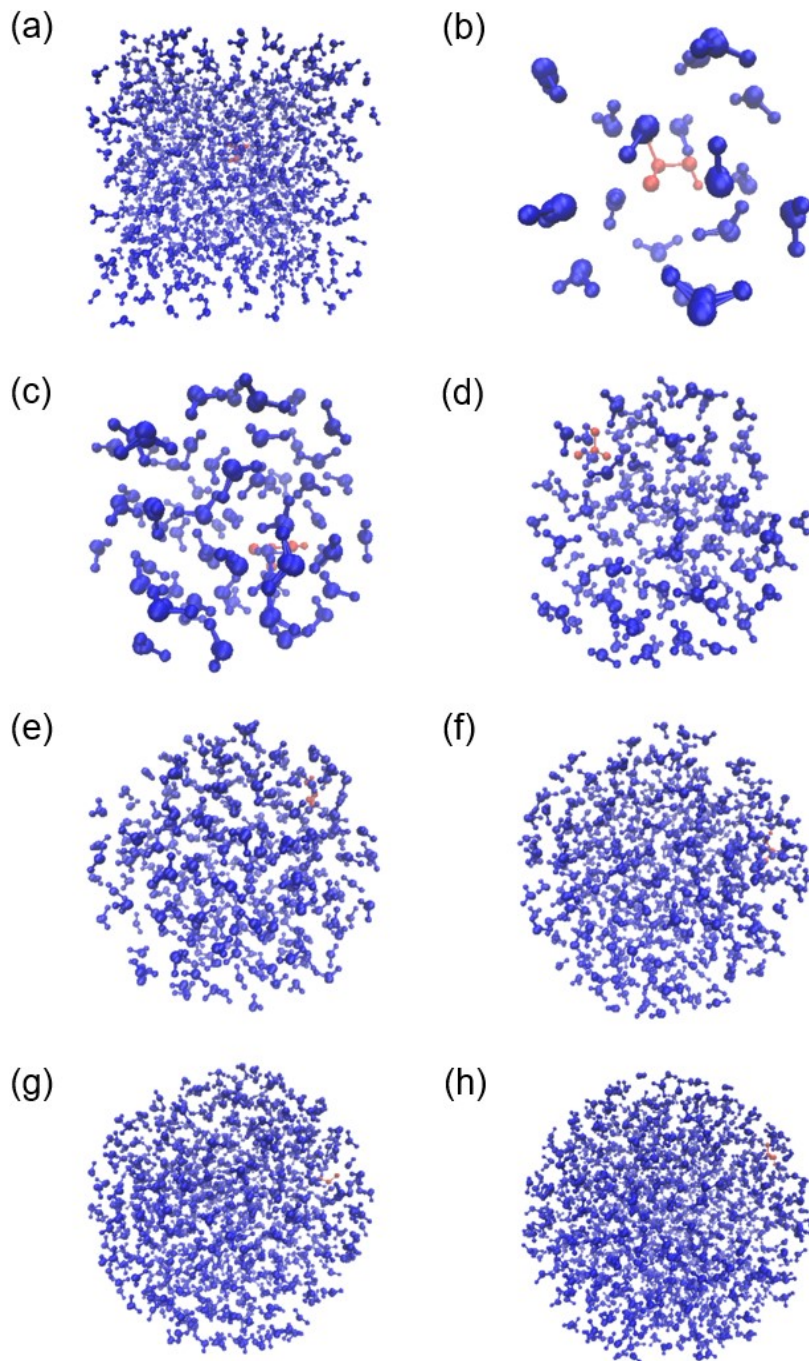

**Figure S1.** The initial structures constructed by Packmol<sup>8</sup> package: (a) HNO<sub>3</sub> in the bulk water, HNO<sub>3</sub> in nanodroplets of (b) 1nm, (c) 1.5nm, (d) 2nm, (e) 2.5nm, (f) 3nm, (g) 3.5nm, (h) 4nm. The blue molecules represent SWM4-NDP water molecules and the red ions represent HNO<sub>3</sub>.

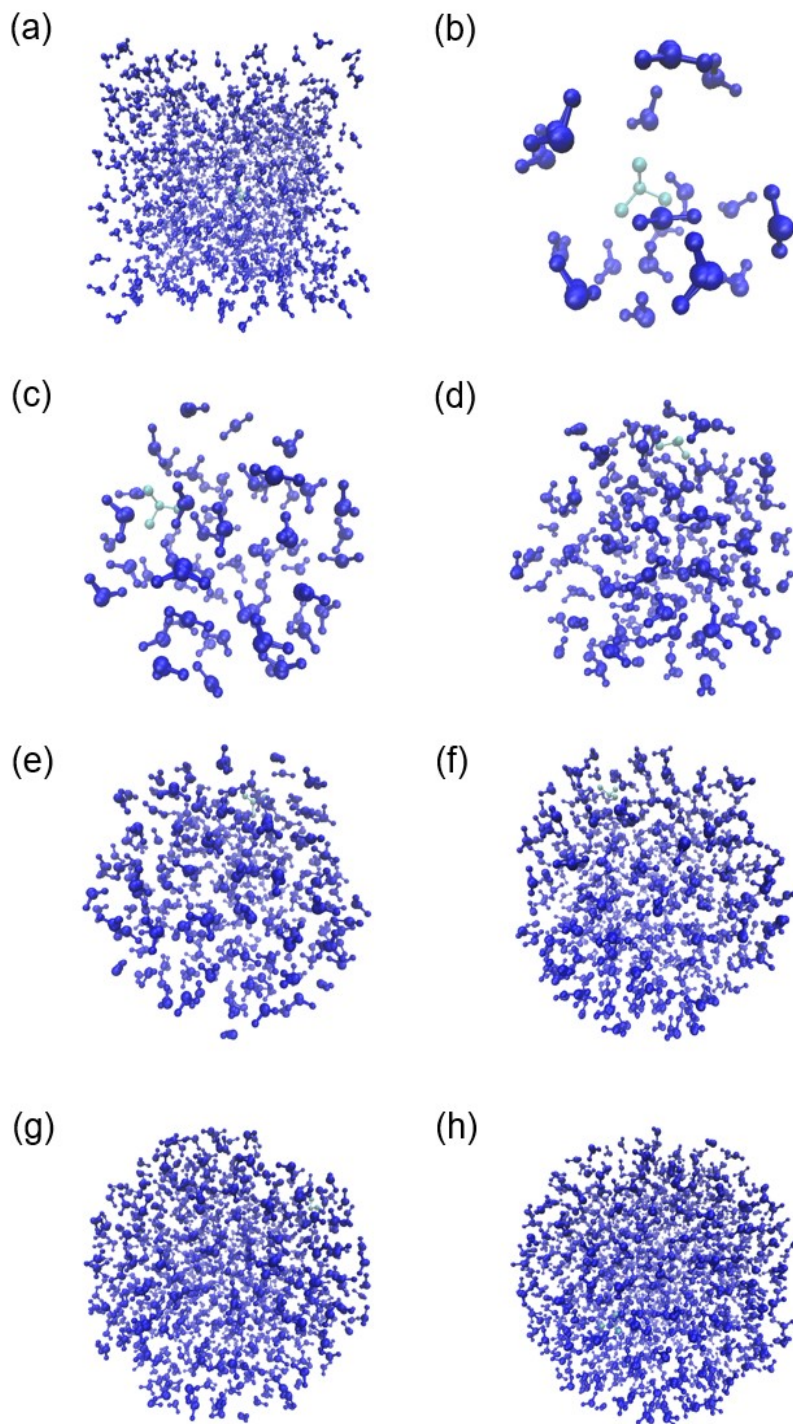

**Figure S2.** The initial structures constructed by Packmol package: (a)  $\text{NO}_3^-$  in the bulk water,  $\text{NO}_3^-$  in nanodroplets of (b) 1 nm, (c) 1.5nm, (d) 2nm, (e) 2.5nm, (f) 3nm, (g) 3.5nm, (h) 4nm. Blue molecules represent SWM4-NDP water molecules and cyan ions represent  $\text{NO}_3^-$ .



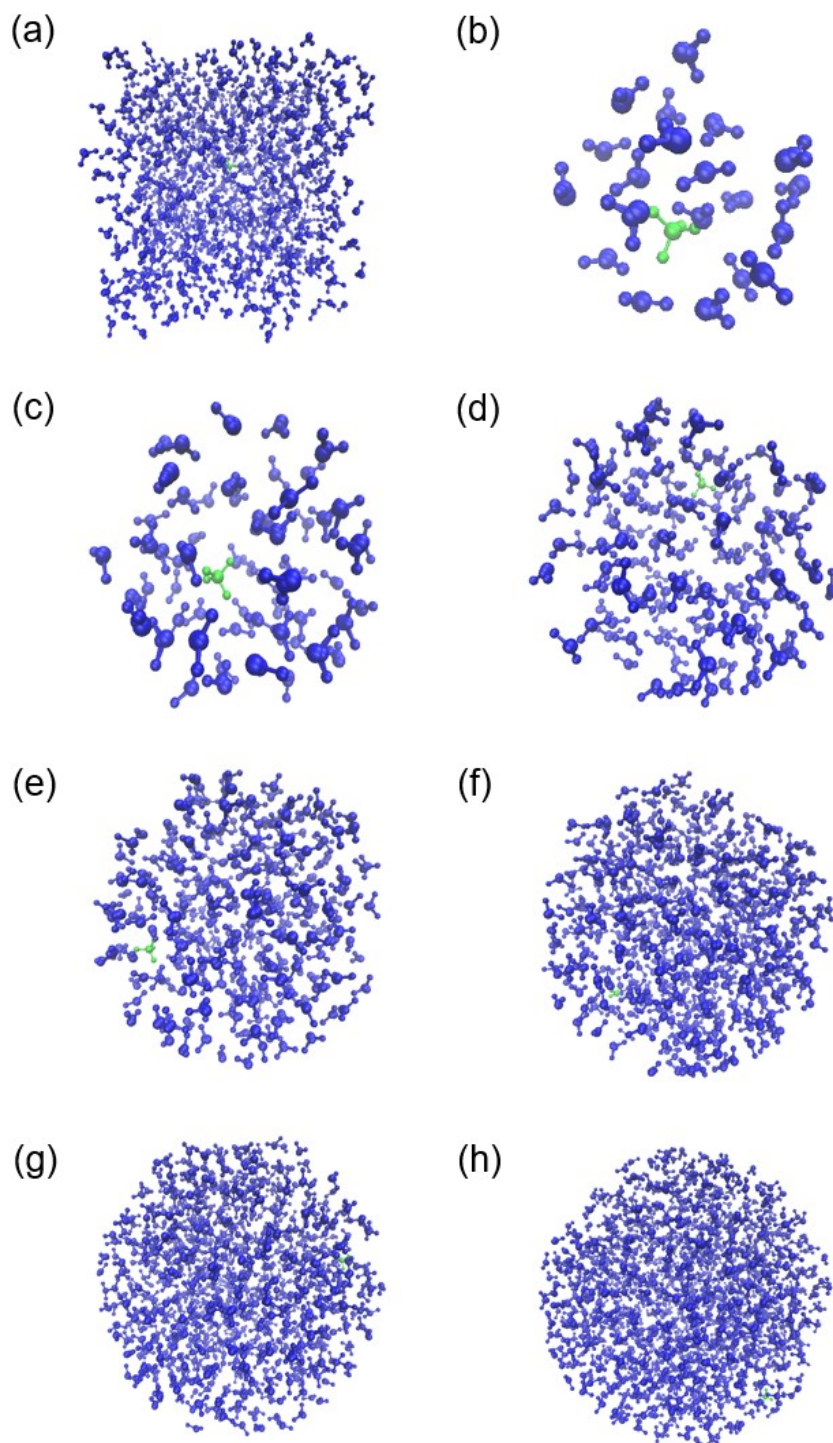

**Figure S3.** The initial structures constructed by Packmol package: (a)  $\text{NH}_4^+$  in the bulk water,  $\text{NH}_4^+$  in nanodroplets of (b) 1 nm, (c) 1.5nm, (d) 2nm, (e) 2.5nm, (f) 3nm, (g) 3.5nm, (h) 4nm. Blue molecules represent SWM4-NDP water molecules and green ions represent  $\text{NH}_4^+$ .

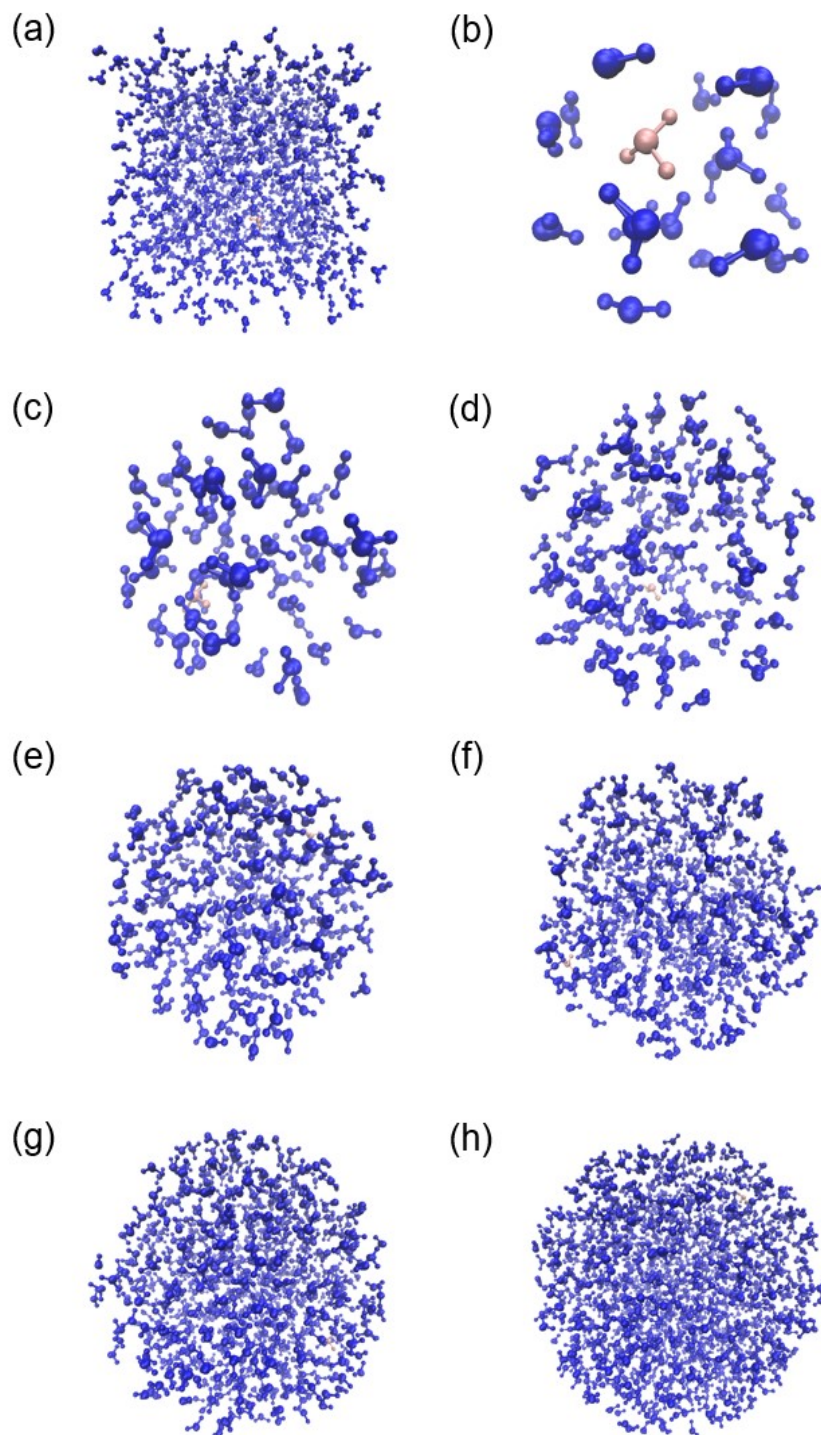

**Figure S4.** The initial structures constructed by Packmol package: (a)  $\text{NH}_3$  in the bulk water,  $\text{NH}_3$  in nanodroplets of (b) 1 nm, (c) 1.5 nm, (d) 2 nm, (e) 2.5 nm, (f) 3 nm, (g) 3.5 nm, and (h) 4 nm. Blue molecules represent SWM4-NDP water molecules and pink molecules represent  $\text{NH}_3$ .

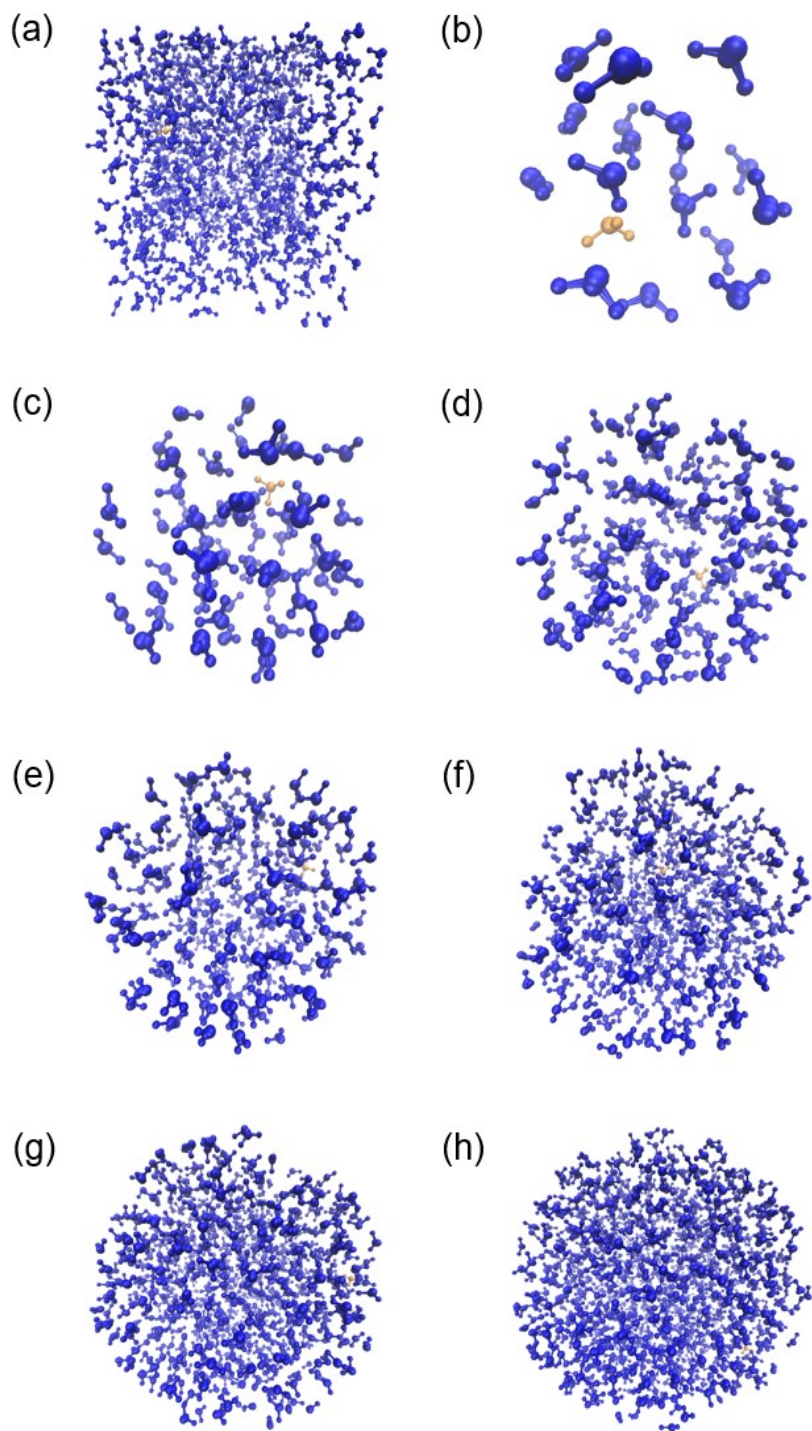

**Figure S5.** The initial structures constructed by Packmol package: (a)  $\text{H}_3\text{O}^+$  in the bulk water,  $\text{H}_3\text{O}^+$  in nanodroplets of (b) 1 nm, (c) 1.5 nm, (d) 2 nm, (e) 2.5 nm, (f) 3 nm, (g) 3.5 nm, and (h) 4 nm. Blue molecules represent SWM4-NDP water molecules and orange ions represent  $\text{H}_3\text{O}^+$ .



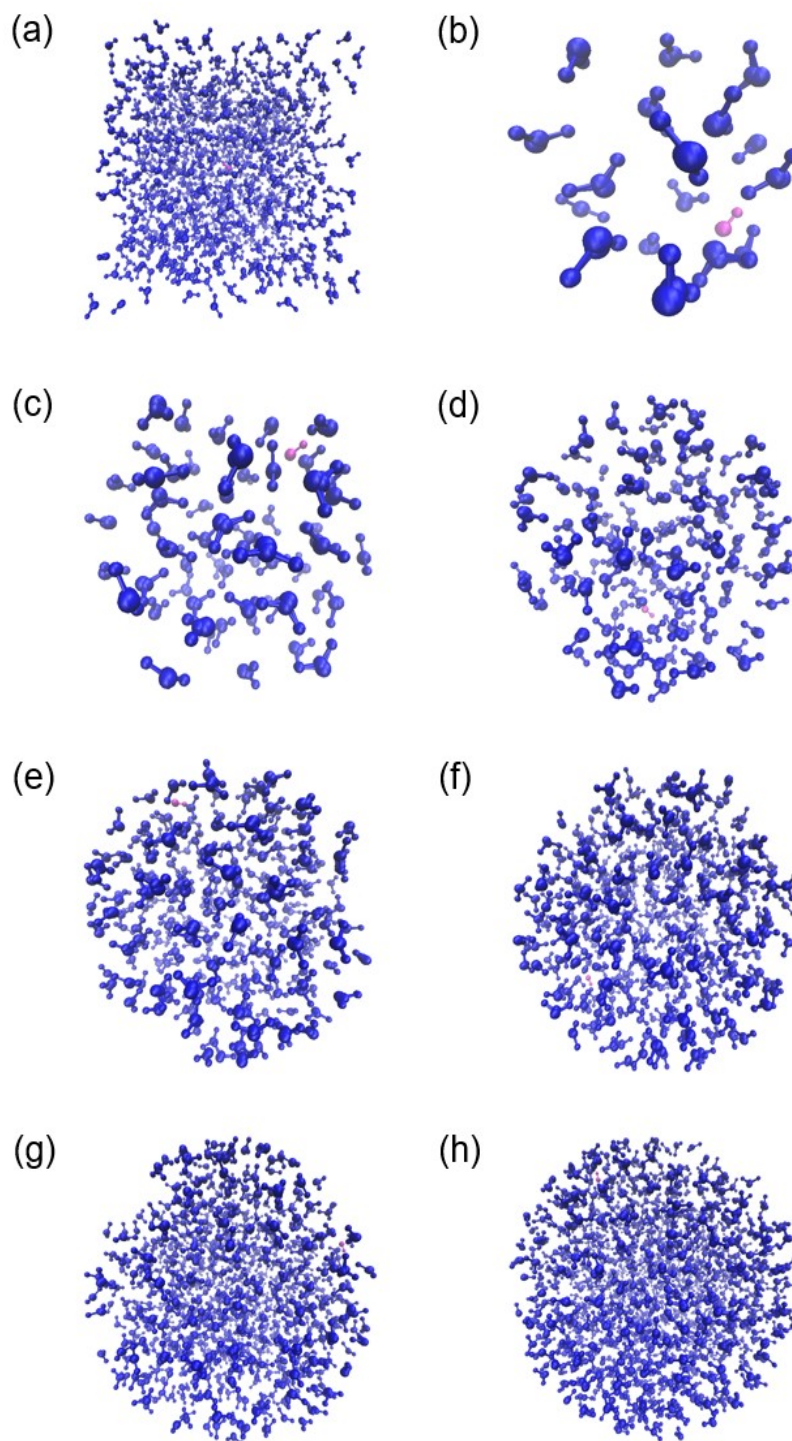

**Figure S6.** The initial structures constructed by Packmol package: (a)  $\text{OH}^-$  in the bulk water,  $\text{OH}^-$  in nanodroplets of (b) 1 nm, (c) 1.5 nm, (d) 2 nm, (e) 2.5 nm, (f) 3 nm, (g) 3.5 nm, (h) and 4 nm. Blue molecules represent SWM4-NDP water molecules and magenta ions represent  $\text{OH}^-$ .

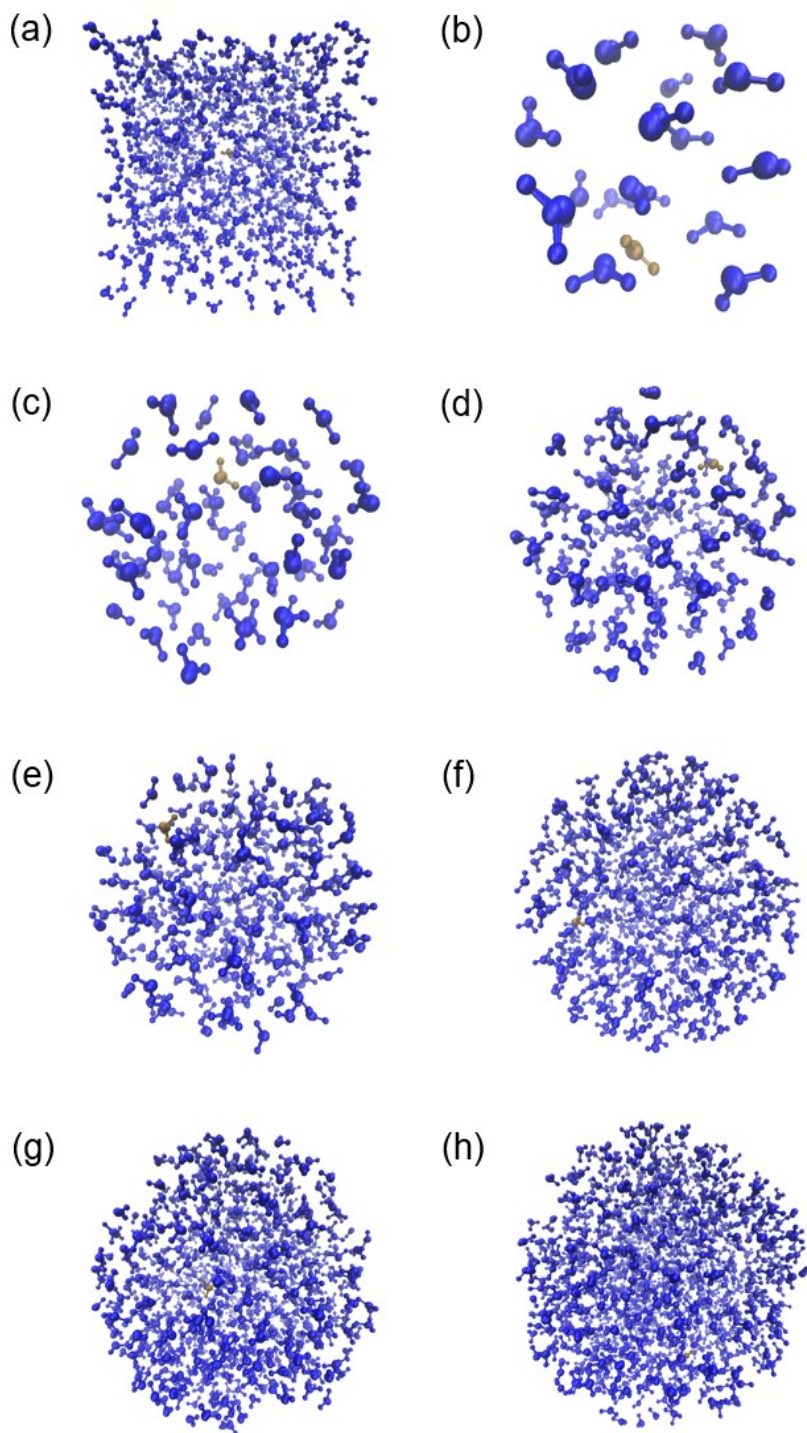

**Figure S7.** The initial structures constructed by Packmol package: (a) H<sub>2</sub>O in the bulk water, H<sub>2</sub>O in nanodroplets of (b) 1 nm, (c) 1.5 nm, (d) 2 nm, (e) 2.5 nm, (f) 3 nm, (g) 3.5 nm, and (h) 4 nm. Blue molecules represent SWM4-NDP water molecules and brown molecules represent H<sub>2</sub>O adopted SWM4-NDP model.

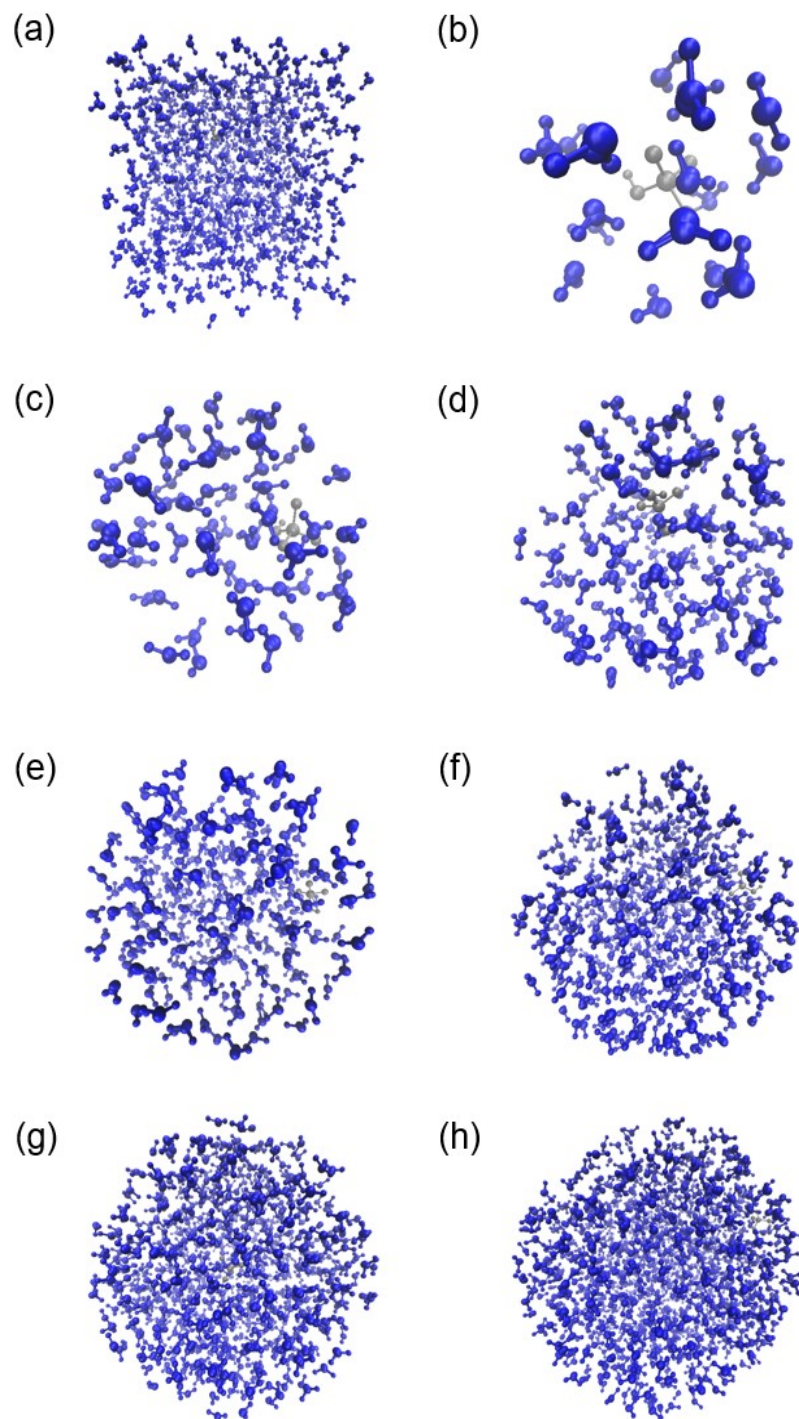

**Figure S8.** The initial structures constructed by Packmol package: (a)  $\text{HSO}_4^-$  in the bulk water,  $\text{HSO}_4^-$  in nanodroplets of (b) 1 nm, (c) 1.5 nm, (d) 2 nm, (e) 2.5 nm, (f) 3 nm, (g) 3.5 nm, (h) 4 nm. Blue molecules represent SWM4-NDP water molecules and gray ions represent  $\text{HSO}_4^-$ .



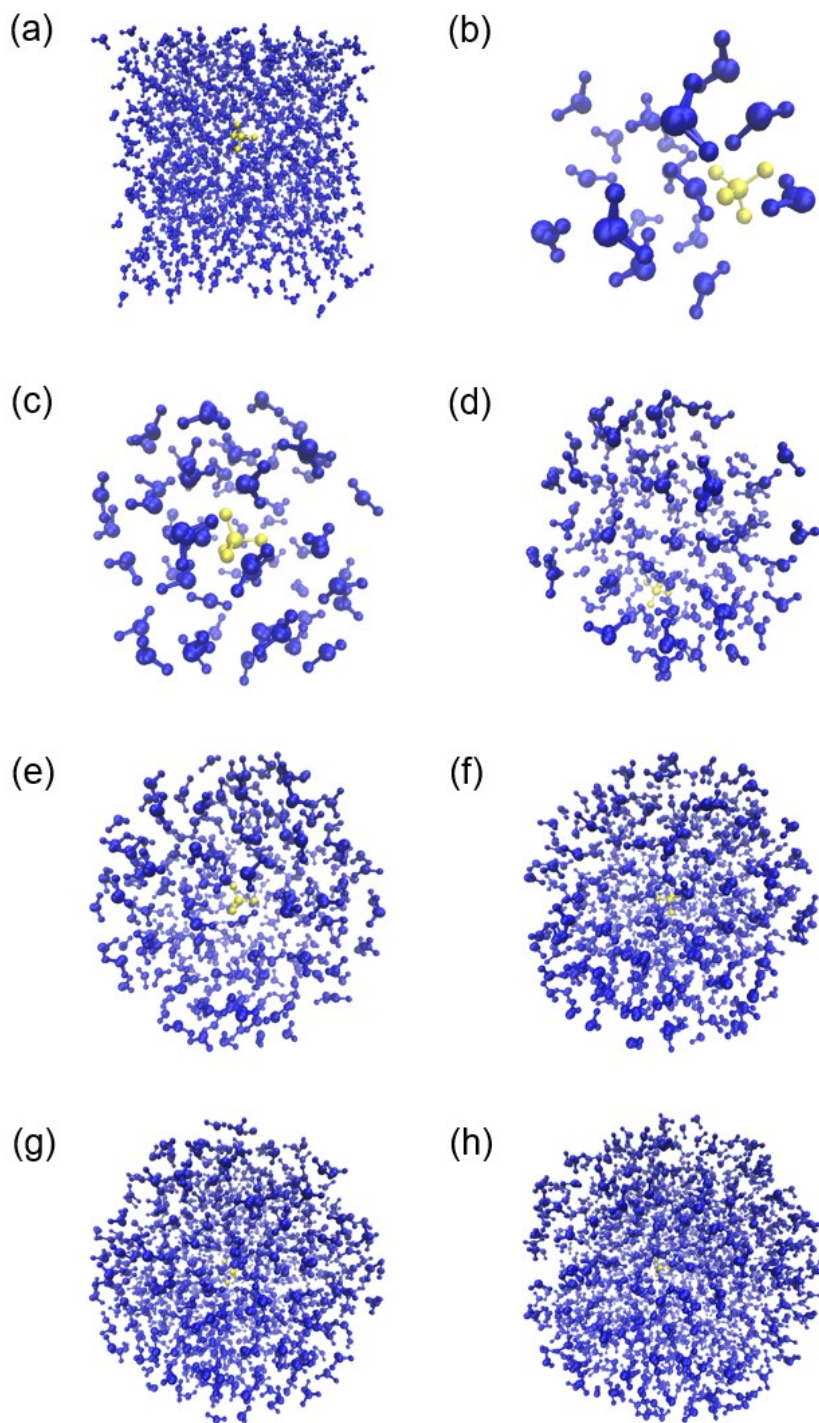

**Figure S9.** The initial structures constructed by Packmol package: (a)  $\text{SO}_4^{2-}$  in the bulk water,  $\text{SO}_4^{2-}$  in nanodroplets of (b) 1 nm, (c) 1.5 nm, (d) 2 nm, (e) 2.5 nm, (f) 3 nm, (g) 3.5 nm, and (h) 4 nm. Blue molecules represent SWM4-NDP water molecules and yellow ions represent  $\text{SO}_4^{2-}$ .

### Section III: Supporting Tables

**Table S1. The charge, polarizability and LJ parameters of each atom in molecules.**

| Molecular type                  | Atom type | q        | $\epsilon$ | $R_{\min}/2$ | $\alpha$ |
|---------------------------------|-----------|----------|------------|--------------|----------|
| SWM4<br>-NDP <sup>3</sup>       | O         | 1.71640  | 0.2109     | 1.7869       | -0.9783  |
|                                 | DO        | -1.71640 | 0.0000     | 0.0000       |          |
|                                 | M         | -1.11466 | 0.0000     | 0.0000       |          |
| H <sub>3</sub> O <sup>+18</sup> | H         | 0.55733  | 0.0000     | 0.0000       |          |
|                                 | O         | 1.3013   | 0.1496     | 1.7117       | -0.98    |
|                                 | DO        | -1.7179  | 0.0000     | 0.0000       |          |
| OH <sup>-19</sup>               | H         | 0.472    | 0.0000     | 0.0000       |          |
|                                 | O         | 1.315    | 0.1825     | 1.9755       | -2.1     |
|                                 | DO        | -2.515   | 0.0000     | 0.0000       |          |
| NH <sub>3</sub>                 | H         | 0.2      | 0.0000     | 0.0000       |          |
|                                 | N         | 1.260    | 0.1043     | 2.078        | -1.69    |
|                                 | DN        | -2.256   | 0.0000     | 0.0000       |          |
| NH <sub>4</sub> <sup>+</sup>    | H         | 0.332    | 0.0699     | 0.5558       |          |
|                                 | N         | 1.36132  | 0.0250     | 1.5500       | -1.4     |
|                                 | DN        | -2.05332 | 0.0000     | 0.0000       |          |
|                                 | H         | 0.423    | 0.0100     | 0.7500       |          |



**Continued Table S1. The charge, polarizability and LJ parameters of each atom in the molecules.**

| Molecular type                 | Atom type | q        | $\epsilon$ | $R_{\min}/2$ | $\alpha$ |
|--------------------------------|-----------|----------|------------|--------------|----------|
| HNO <sub>3</sub> <sup>20</sup> | N         | 0.857    | 0.0858     | 2.1199       |          |
|                                | O         | 1.633    | 0.1463     | 1.9202       | -1.3     |
|                                | DO        | -1.979   | 0.0000     | 0.0000       |          |
|                                | OH        | 1.137    | 0.093      | 2.0439       | -0.9     |
|                                | DOH       | -1.646   | 0.0000     | 0.0000       |          |
| NO <sub>3</sub> <sup>-</sup>   | N         | 0.95     | 0.2        | 2.1888       |          |
|                                | O         | 1.32863  | 0.1550     | 1.7701       | -1.3     |
| NO <sub>3</sub> <sup>-</sup>   | DO        | -1.97863 | 0.0000     | 0.0000       |          |
| HSO <sub>4</sub> <sup>-</sup>  | S         | 3.00353  | 0.27       | 1.90         | -0.93    |
|                                | DS        | -1.67353 | 0.0000     | 0.0000       |          |
|                                | O         | 1.02067  | 0.07       | 1.865        | -0.99    |
|                                | DO        | -1.72667 | 0.0000     | 0.0000       |          |
|                                | OH        | 0.86046  | 0.17       | 1.77         | -0.67    |
| SO <sub>4</sub> <sup>2-</sup>  | DOH       | -1.42046 | 0.0000     | 0.0000       |          |
|                                | H         | 0.348    | 0.01       | 0.4          |          |
|                                | S         | 3.67353  | 0.27       | 1.90         | -0.93    |
|                                | DS        | -1.67353 | 0.0000     | 0.0000       |          |
|                                | O         | 0.72667  | 0.15       | 1.95         | -0.99    |
|                                | DO        | -1.72667 | 0.0000     | 0.0000       |          |

In this table, the element symbol represents the corresponding atom in the molecules, XH represents the atom connected to the hydrogen atom in the molecule, and DX represents the Drude oscillator connected to the X.

**Table S2. The single point energy (a.u.) of HSO<sub>4</sub><sup>-</sup> and SO<sub>4</sub><sup>2-</sup>, the deprotonation energy (kcal/mol) in the gas phase and dissociation constants of HSO<sub>4</sub><sup>-</sup> calculated on different levels.**

|                               | CCSD(T)/<br>aug-cc-pVTZ | M05-2X/<br>6-31G* | M06-2X/<br>6-311++G** | M06-2X/<br>aug-cc- pVTZ | M06-2X/<br>6-31G* |
|-------------------------------|-------------------------|-------------------|-----------------------|-------------------------|-------------------|
| HSO <sub>4</sub> <sup>-</sup> | -698.95602              | -699.62820        | -699.69100            | -699.77614              | -699.03236        |
| SO <sub>4</sub> <sup>2-</sup> | -698.23111              | -698.88238        | -698.97011            | -699.05368              | -698.30514        |
| $\Delta G_{\text{gas}}$       | 285.84                  | 298.90            | 283.22                | 305.21                  | 281.16            |
| pK <sub>a</sub>               | -5.62                   | 0.90              | -7.54                 | 8.57                    | -9.05             |
| pK <sub>a,exp</sub>           |                         |                   | 2                     |                         |                   |

**Table S3. Fitted parameters in the function of  $\Delta G_s(X,N) = \Delta G_s(X,\infty) + a \cdot N^{-1/3}$  (all in kcal/mol).**

| Solute X                      | $\Delta G_s(X, \infty)$ | $a$    | R <sup>2</sup> | $\Delta G_{s,\text{exp}}$ |
|-------------------------------|-------------------------|--------|----------------|---------------------------|
| H <sub>3</sub> O <sup>+</sup> | -109.35                 | 82.93  | 0.990          | -110.40                   |
| OH <sup>-</sup>               | -107.72                 | 85.75  | 0.990          | -105                      |
| NH <sub>4</sub> <sup>+</sup>  | -83.46                  | 62.53  | 0.992          | -84.90                    |
| NO <sub>3</sub> <sup>-</sup>  | -75.05                  | 83.77  | 0.980          | -76                       |
| HSO <sub>4</sub> <sup>-</sup> | -72.78                  | 87.54  | 0.991          | -70                       |
| SO <sub>4</sub> <sup>2-</sup> | -262.63                 | 255.45 | 0.995          | -258.13                   |
| H <sub>2</sub> O              | -5.96                   | 12.61  | 0.944          | -6.32                     |
| NH <sub>3</sub>               | -3.68                   | 7.65   | 0.969          | -4.31                     |
| HNO <sub>3</sub>              | -8.88                   | 10.76  | 0.944          | -9.05                     |

**Table S4. Parameters of the function  $\text{p}K_a = \text{p}K_\infty + A_1 N^{-1/3}$ , expect  $\text{p}K_b$  for NH<sub>3</sub>.**

| X                             | $\text{p}K_{a,\infty}$<br>( $\text{p}K_{b,\infty}$ ) | $A_1$  | $\text{p}K_{a,\text{exp}}^{15}$<br>( $\text{p}K_{b,\text{exp}}$ ) |
|-------------------------------|------------------------------------------------------|--------|-------------------------------------------------------------------|
| H <sub>2</sub> O              | 13.11                                                | 111.22 | 15.74                                                             |
| HNO <sub>3</sub>              | -1.89                                                | 111.12 | -1.3                                                              |
| HSO <sub>4</sub> <sup>-</sup> | 0.69                                                 | 180.67 | 2                                                                 |
| NH <sub>3</sub>               | 1.74                                                 | 99.90  | 4.74                                                              |

**Table S5. Calculated pH values of H<sub>2</sub>O, HNO<sub>3</sub>, HSO<sub>4</sub><sup>-</sup> and NH<sub>3</sub> of simulated concentrations in nanodroplets with different diameters.**

| <i>R/nm</i> | <i>N</i> <sup>-1/3</sup> | pH               |                  |                               |                 |
|-------------|--------------------------|------------------|------------------|-------------------------------|-----------------|
|             |                          | H <sub>2</sub> O | HNO <sub>3</sub> | HSO <sub>4</sub> <sup>-</sup> | NH <sub>3</sub> |
| 1.0         | 0.389                    | 27.24            | 20.34            | 27.24                         | 34.51           |
| 1.5         | 0.255                    | 19.96            | 13.33            | 19.96                         | 26.21           |
| 2.0         | 0.193                    | 16.47            | 10.03            | 16.46                         | 22.18           |
| 2.5         | 0.155                    | 14.33            | 8.03             | 14.18                         | 19.68           |
| 3.0         | 0.129                    | 12.84            | 6.67             | 12.29                         | 17.93           |
| 3.5         | 0.110                    | 11.76            | 5.69             | 10.77                         | 16.64           |
| 4.0         | 0.096                    | 10.95            | 4.97             | 9.59                          | 15.67           |

**Table S6. Calculated pH values of HNO<sub>3</sub>, HSO<sub>4</sub><sup>-</sup> and NH<sub>3</sub> in nanodroplets with different diameters (*c*<sub>HA</sub> = 0.001 M).**

| <i>R/nm</i> | <i>N</i> <sup>-1/3</sup> | pH               |                               |                 |
|-------------|--------------------------|------------------|-------------------------------|-----------------|
|             |                          | HNO <sub>3</sub> | HSO <sub>4</sub> <sup>-</sup> | NH <sub>3</sub> |
| 1.0         | 0.389                    | 22.09            | 27.24                         | 32.76           |
| 1.5         | 0.255                    | 14.82            | 19.96                         | 24.72           |
| 2.0         | 0.193                    | 11.33            | 16.47                         | 20.88           |
| 2.5         | 0.155                    | 9.19             | 14.31                         | 18.52           |
| 3.0         | 0.129                    | 7.71             | 12.75                         | 16.89           |
| 3.5         | 0.110                    | 6.63             | 11.45                         | 15.71           |
| 4.0         | 0.096                    | 5.82             | 10.34                         | 14.82           |

**Table S7. Calculated pH values  $\text{HSO}_4^-/\text{SO}_4^{2-}$ ,  $\text{HNO}_3/\text{NO}_3^-$  as well as  $\text{NH}_3/\text{NH}_4^+$  ion pairs in nanodroplets with different diameters ( $c_{\text{HA}} = c_{\text{A}^-} = 0.001 \text{ M}$ ).**

| $R/\text{nm}$ | $N^{-1/3}$ | pH                           |                                   |                             |
|---------------|------------|------------------------------|-----------------------------------|-----------------------------|
|               |            | $\text{HNO}_3/\text{NO}_3^-$ | $\text{HSO}_4^-/\text{SO}_4^{2-}$ | $\text{NH}_3/\text{NH}_4^+$ |
| 1.0           | 0.389      | 27.24                        | 27.24                             | 27.24                       |
| 1.5           | 0.255      | 19.96                        | 19.96                             | 19.96                       |
| 2.0           | 0.193      | 16.47                        | 16.47                             | 16.47                       |
| 2.5           | 0.155      | 14.29                        | 14.33                             | 14.33                       |
| 3.0           | 0.129      | 12.28                        | 12.84                             | 12.86                       |
| 3.5           | 0.110      | 10.24                        | 11.76                             | 11.82                       |
| 4.0           | 0.096      | 8.64                         | 10.95                             | 11.16                       |

**Table S8. Calculated pOH values of  $\text{NH}_3$  in nanodroplets of different diameters.**

| $R/\text{nm}$ | $N^{-1/3}$ | pOH                           |                                   |                                                         |
|---------------|------------|-------------------------------|-----------------------------------|---------------------------------------------------------|
|               |            | $c_{\text{NH}_3}=55/\text{N}$ | $c_{\text{NH}_3}=0.001 \text{ M}$ | $c_{\text{NH}_3} = c_{\text{NH}_4^+} = 0.001 \text{ M}$ |
| 1.0           | 0.389      | 19.97                         | 21.72                             | 27.24                                                   |
| 1.5           | 0.255      | 13.72                         | 15.20                             | 19.96                                                   |
| 2.0           | 0.193      | 10.76                         | 12.06                             | 16.47                                                   |
| 2.5           | 0.155      | 8.98                          | 10.14                             | 14.33                                                   |
| 3.0           | 0.129      | 7.77                          | 8.80                              | 12.84                                                   |
| 3.5           | 0.110      | 6.89                          | 7.83                              | 11.71                                                   |
| 4.0           | 0.096      | 6.25                          | 7.09                              | 10.76                                                   |

**Table S9. Fitting parameters of the function  $\ln H = \ln H_\infty + b \cdot N^{-1/3}$  in the unit of mol/(m<sup>3</sup> · Pa).**

| X                | $\ln H_\infty$ | $b$    | R <sup>2</sup> | $\ln H_{\text{exp}}^{16}$ |
|------------------|----------------|--------|----------------|---------------------------|
| NH <sub>3</sub>  | -1.13          | -15.57 | 0.902          | -0.53                     |
| H <sub>2</sub> O | 2.76           | -23.62 | 0.938          | 2.85                      |
| HNO <sub>3</sub> | 7.5            | -19.95 | 0.946          | 7.65                      |

**Table S10. Parameters of the function  $\text{p}K_a^* = \text{p}K_{a,\infty}^* + A_2 N^{-1/3}$ .**

| X                             | $\text{p}K_{a,\infty}^*$ | $A_2$  | $\text{p}K_a^{*17}$ |
|-------------------------------|--------------------------|--------|---------------------|
| H <sub>2</sub> O              | 18.52                    | 121.47 | -                   |
| HNO <sub>3</sub>              | 1.46                     | 119.78 | 2.1                 |
| HSO <sub>4</sub> <sup>-</sup> | 0.69                     | 180.67 | 2                   |
| NH <sub>4</sub> <sup>+</sup>  | 2.53                     | 6.91   | 2.4                 |

**Table S11. Calculated pH\* values of H<sub>2</sub>O, HNO<sub>3</sub>, HSO<sub>4</sub><sup>-</sup> and NH<sub>4</sub><sup>+</sup> of simulated concentrations in nanodroplets with different diameters.**

| $R/nm$ | $N^{-1/3}$ | pH*              |                  |                               |                              |
|--------|------------|------------------|------------------|-------------------------------|------------------------------|
|        |            | H <sub>2</sub> O | HNO <sub>3</sub> | HSO <sub>4</sub> <sup>-</sup> | NH <sub>4</sub> <sup>+</sup> |
| 1.0    | 0.389      | 31.94            | 23.76            | 32.01                         | 2.35                         |
| 1.5    | 0.255      | 23.97            | 16.05            | 23.31                         | 2.16                         |
| 2.0    | 0.193      | 20.16            | 12.46            | 17.94                         | 2.13                         |
| 2.5    | 0.155      | 17.82            | 10.34            | 14.66                         | 2.14                         |
| 3.0    | 0.129      | 16.21            | 8.90             | 12.43                         | 2.17                         |
| 3.5    | 0.110      | 15.03            | 7.89             | 10.85                         | 2.21                         |
| 4.0    | 0.096      | 14.15            | 7.15             | 9.70                          | 2.25                         |

**Table S12. Calculated pH\* values of HNO<sub>3</sub>, HSO<sub>4</sub><sup>-</sup> and NH<sub>4</sub><sup>+</sup> in nanodroplets with different diameters ( $c_{\text{HA}} = 0.001 \text{ M}$ ).**

| $R/\text{nm}$ | $N^{-1/3}$ | pH*              |                               |                              |
|---------------|------------|------------------|-------------------------------|------------------------------|
|               |            | HNO <sub>3</sub> | HSO <sub>4</sub> <sup>-</sup> | NH <sub>4</sub> <sup>+</sup> |
| 1.0           | 0.389      | 25.52            | 31.94                         | 4.11                         |
| 1.5           | 0.255      | 17.53            | 23.93                         | 3.65                         |
| 2.0           | 0.193      | 13.76            | 19.26                         | 3.43                         |
| 2.5           | 0.155      | 11.50            | 15.86                         | 3.30                         |
| 3.0           | 0.129      | 9.93             | 13.47                         | 3.21                         |
| 3.5           | 0.110      | 8.82             | 11.75                         | 3.15                         |
| 4.0           | 0.096      | 8.00             | 10.46                         | 3.10                         |

**Table S13. Calculated pH\* values of HSO<sub>4</sub><sup>-</sup>/SO<sub>4</sub><sup>2-</sup>, HNO<sub>3</sub>/NO<sub>3</sub><sup>-</sup> and NH<sub>4</sub><sup>+</sup>/NH<sub>3</sub> ion pairs in nanodroplets with different diameters ( $c_{\text{HA}} = c_{\text{A}^-} = 0.001 \text{ M}$ ).**

| $R/\text{nm}$ | $N^{-1/3}$ | pH*                                            |                                                              |                                               |
|---------------|------------|------------------------------------------------|--------------------------------------------------------------|-----------------------------------------------|
|               |            | HNO <sub>3</sub> /NO <sub>3</sub> <sup>-</sup> | HSO <sub>4</sub> <sup>-</sup> /SO <sub>4</sub> <sup>2-</sup> | NH <sub>4</sub> <sup>+</sup> /NH <sub>3</sub> |
| 1.0           | 0.389      | 31.94                                          | 31.94                                                        | 5.22                                          |
| 1.5           | 0.255      | 23.97                                          | 23.97                                                        | 4.30                                          |
| 2.0           | 0.193      | 20.16                                          | 20.16                                                        | 3.86                                          |
| 2.5           | 0.155      | 17.82                                          | 17.82                                                        | 3.60                                          |
| 3.0           | 0.129      | 16.12                                          | 16.21                                                        | 3.42                                          |
| 3.5           | 0.110      | 14.49                                          | 15.03                                                        | 3.29                                          |
| 4.0           | 0.096      | 12.96                                          | 14.15                                                        | 3.20                                          |

## **Section IV: References**

- (1) Pliego, J. R. Thermodynamic cycles and the calculation of pKa. *Chemical Physics Letters* **2003**, *367* (1), 145-149. DOI: [https://doi.org/10.1016/S0009-2614\(02\)01686-X](https://doi.org/10.1016/S0009-2614(02)01686-X).
- (2) Ben-Naim, A. Standard thermodynamics of transfer. Uses and misuses. *The Journal of Physical Chemistry* **1978**, *82* (7), 792-803. DOI: 10.1021/j100496a008.
- (3) Lamoureux, G.; Harder, E.; Vorobyov, I. V.; Roux, B.; MacKerell, A. D. A polarizable model of water for molecular dynamics simulations of biomolecules. *Chemical Physics Letters* **2006**, *418* (1-3), 245-249. DOI: 10.1016/j.cplett.2005.10.135.
- (4) Warren, G. L.; Patel, S. Hydration free energies of monovalent ions in transferable intermolecular potential four point fluctuating charge water: An assessment of simulation methodology and force field performance and transferability. *Journal of Chemical Physics* **2007**, *127* (6), Article. DOI: 10.1063/1.2771550.
- (5) Schaaf, C.; Gekle, S. Dielectric response of the water hydration layer around spherical solutes. *Physical Review E* **2015**, *92* (3), Article. DOI: 10.1103/PhysRevE.92.032718.
- (6) Bennett, C. H. Efficient estimation of free energy differences from Monte Carlo data. *Journal of Computational Physics* **1976**, *22* (2), 245-268. DOI: [https://doi.org/10.1016/0021-9991\(76\)90078-4](https://doi.org/10.1016/0021-9991(76)90078-4).
- (7) Lamoureux, G.; Roux, B. Absolute hydration free energy scale for alkali and halide ions established from simulations with a polarizable force field. *Journal of Physical Chemistry B* **2006**, *110* (7), 3308-3322, Review. DOI: 10.1021/jp056043p.
- (8) Martinez, L.; Andrade, R.; Birgin, E. G.; Martinez, J. M. PACKMOL: A Package for Building Initial Configurations for Molecular Dynamics Simulations. *Journal of Computational Chemistry* **2009**, *30* (13), 2157-2164, Article. DOI: 10.1002/jcc.21224.
- (9) Zwanzig, R. W. High - Temperature Equation of State by a Perturbation Method. II. Polar Gases. *The Journal of Chemical Physics* **1955**, *23* (10), 1915-1922. DOI: 10.1063/1.1740604.
- (10) Harder, E.; Anisimov, V. M.; Whitfield, T. W.; MacKerell, A. D., Jr.; Roux, B. Understanding the dielectric properties of liquid amides from a polarizable force field. *Journal of Physical Chemistry B* **2008**, *112* (11), 3509-3521, Article. DOI: 10.1021/jp709729d.
- (11) *Gaussian 16 Rev. B.01*; Wallingford, CT, 2016. (accessed).
- (12) Lee, C.; Yang, W.; Parr, R. G. Development of the Colle-Salvetti correlation-energy formula into a functional of the electron density. *Phys Rev B Condens Matter* **1988**, *37* (2), 785-789. DOI: 10.1103/physrevb.37.785.
- (13) Pople, J. A.; Head - Gordon, M.; Raghavachari, K. Quadratic configuration interaction. A general technique for determining electron correlation energies. *The Journal of Chemical Physics* **1987**, *87* (10), 5968-5975. DOI: 10.1063/1.453520.
- (14) Ho, J.; Klamt, A.; Coote, M. L. Comment on the Correct Use of Continuum Solvent Models. *Journal of Physical Chemistry A* **2010**, *114* (51), 13442-13444, Article. DOI: 10.1021/jp107136j.



- (15) Haynes, W. *CRC Handbook of Chemistry and Physics*; 2012.
- (16) Sander, R. Compilation of Henry's law constants (version 4.0) for water as solvent. *Atmospheric Chemistry and Physics* **2015**, *15* (8), 4399-4981. DOI: 10.5194/acp-15-4399-2015.
- (17) Zheng, G.; Su, H.; Wang, S.; Andreae, M. O.; Pöschl, U.; Cheng, Y. Multiphase buffer theory explains contrasts in atmospheric aerosol acidity. *Science* **2020**, *369* (6509), 1374-1377. DOI: 10.1126/science.aba3719 (accessed 2023/03/30).
- (18) Vacha, R.; Buch, V.; Milet, A.; Devlin, P.; Jungwirth, P. Autoionization at the surface of neat water: is the top layer pH neutral, basic, or acidic? *Physical Chemistry Chemical Physics* **2007**, *9* (34), 4736-4747, Article. DOI: 10.1039/b704491g.
- (19) Wick, C. D.; Dang, L. X. Investigating Hydroxide Anion Interfacial Activity by Classical and Multistate Empirical Valence Bond Molecular Dynamics Simulations. *Journal of Physical Chemistry A* **2009**, *113* (22), 6356-6364, Article. DOI: 10.1021/jp900290y.
- (20) Jayaraman, S.; Thompson, A. P.; von Lilienfeld, O. A.; Maginn, E. J. Molecular Simulation of the Thermal and Transport Properties of Three Alkali Nitrate Salts. *Industrial & Engineering Chemistry Research* **2010**, *49* (2), 559-571, Article. DOI: 10.1021/ie9007216.
